# Supplementary material
Source: PubMed Central journal article supplement (PMC10408718)
Supplement: NIHMS1919670-supplement-Supplementary_Material.pdf [file NIHMS1919670-supplement-Supplementary_Material.pdf]

**Supplementary Material for the Article:**

Subjective effects of combustible, vaporized, and edible cannabis: Results from a survey of  
adolescent cannabis users

**This material supplements, but does not replace, the peer-reviewed paper in  
*Drug and Alcohol Dependence.***

**Authors:** Esthelle Ewusi Boisvert, BA<sup>1</sup>, Dayoung Bae, PhD<sup>2</sup>, Raina D. Pang, PhD<sup>3</sup>, Jordan P. Davis, PhD<sup>4</sup>, Lorraine I. Kelley-Quon, MD, MSHS<sup>3,5</sup>, Jessica L. Barrington-Trimis, PhD<sup>3</sup>, Matthew G. Kirkpatrick, PhD<sup>3</sup>, Stephanie H. Chai<sup>3</sup> & Adam M. Leventhal, PhD<sup>1,3</sup>

**Author Affiliation:** Department of Psychology, University of Southern California, Los Angeles, CA<sup>1</sup>; Department of Home Economics Education, College of Education, Korea University, Seoul, South Korea<sup>2</sup>; Department of Preventive Medicine, University of Southern California, Los Angeles, CA<sup>3</sup>; Department of Children, Youth, and Families, Suzanne Dworak-Peck School of Social Work; USC Center for Artificial Intelligence in Society, Los Angeles, CA<sup>4</sup>; Division of Pediatric Surgery, Children's Hospital Los Angeles, Los Angeles, CA; Department of Surgery, Keck School of Medicine of the University of Southern California, Los Angeles, CA<sup>5</sup>

**Correspondence:** Adam Leventhal, University of Southern California, 2250 Alcazar St., CSC 271, Los Angeles, California, Tel: 323-442-8222, Fax: 323-442-2359, Email: adam.leventhal@usc.edu

Supplemental Table 1. Comparison of Participant Characteristics between those Included vs. Excluded in the Analytic Sample<sup>a</sup>

|                             | <b>Past 6-month<br/>cannabis users<br/>included in analytic<br/>sample<sup>b</sup><br/>(N = 584)</b> | <b>Past 6-month<br/>cannabis<br/>non-users and<br/>excluded in analytic<br/>sample<sup>c</sup><br/>(N = 2,593)</b> | <b><i>P</i> value</b> |
|-----------------------------|------------------------------------------------------------------------------------------------------|--------------------------------------------------------------------------------------------------------------------|-----------------------|
| Gender                      |                                                                                                      |                                                                                                                    |                       |
| Male                        | 263 (45.0)                                                                                           | 1199 (46.2)                                                                                                        | .32                   |
| Female                      | 321 (55.0)                                                                                           | 1394 (53.8)                                                                                                        |                       |
| Age, <i>M</i> ( <i>SD</i> ) | 16.13 (.43)                                                                                          | 16.08 (.41)                                                                                                        | .17                   |
| SES <sup>c</sup>            | n = 504 <sup>d</sup>                                                                                 | n = 2249 <sup>d</sup>                                                                                              |                       |
| High                        | 173 (34.3)                                                                                           | 926 (41.2)                                                                                                         | .003                  |
| Low                         | 331 (65.7)                                                                                           | 1323 (58.8)                                                                                                        |                       |
| Race/Ethnicity              | n = 574 <sup>d</sup>                                                                                 | n = 2593 <sup>d</sup>                                                                                              |                       |
| Asian                       | 42 (7.3)                                                                                             | 495 (19.4)                                                                                                         | < .001                |
| Black                       | 31 (5.4)                                                                                             | 118 (4.6)                                                                                                          |                       |
| Hispanic                    | 323 (56.3)                                                                                           | 1187 (46.5)                                                                                                        |                       |
| White                       | 100 (17.4)                                                                                           | 407 (15.9)                                                                                                         |                       |
| Multiethnic or multiracial  | 35 (6.1)                                                                                             | 172 (6.7)                                                                                                          |                       |
| Other <sup>e</sup>          | 43 (7.5)                                                                                             | 173 (6.8)                                                                                                          |                       |
| Past 30-day use             | n = 573 <sup>d</sup>                                                                                 | n = 2582 <sup>d</sup>                                                                                              |                       |
| Any form of cannabis use    | 382 (66.7)                                                                                           | 78 (3.0)                                                                                                           | < .001                |

*Note.* <sup>a</sup> Data are expressed as No. (%) unless otherwise specified. <sup>b</sup>Data provided for past 6-month users of cannabis in any form. <sup>c</sup>Data provided for respondents who did not use cannabis during the past 6 months. <sup>d</sup>High SES is defined as parental education equal or higher than some college degree and family income higher than 185% the US poverty line (i.e., respondents who are not eligible for free or reduced lunch). Low SES is defined as the other respondents. <sup>e</sup>The denominator is provided due to missing data for this variable. <sup>e</sup>Other category combines American Indian/Alaska Native (n = 32), Native Hawaiian/Pacific Islander (n = 136), and respondents who did not self-identify with any of the categories provided (n = 48).

Supplemental Table 2. Relative Odds of Subjective Cannabis Effects in Past 6 Months, by Method of Administration (Unadjusted models)<sup>a</sup>

| Outcomes                                                                 | Pairwise contrast of subjective effect by method of administration |         |                                  |         |                                  |         |
|--------------------------------------------------------------------------|--------------------------------------------------------------------|---------|----------------------------------|---------|----------------------------------|---------|
|                                                                          | Combustible vs. Vaporized                                          |         | Edible vs. Vaporized             |         | Combustible vs. Edible           |         |
|                                                                          | Estimate <sup>b,c</sup> (95% CI)                                   | P Value | Estimate <sup>b,c</sup> (95% CI) | P Value | Estimate <sup>b,c</sup> (95% CI) | P Value |
| <b>Subjective effect composite scores (primary outcomes)<sup>b</sup></b> |                                                                    |         |                                  |         |                                  |         |
| Positive effects composite                                               | .87 (.15, .79)                                                     | <.001*  | .67 (.15, .79)                   | .004*   | .40 (.18, .62)                   | <.001*  |
| Negative effects composite                                               | .60 (.32, .88)                                                     | <.001*  | .93 (.63, 1.22)                  | <.001*  | -.33 (-.54, -.12)                | .002*   |
| <b>Item-level ratings (secondary outcomes)<sup>c</sup></b>               |                                                                    |         |                                  |         |                                  |         |
| Positive effects                                                         |                                                                    |         |                                  |         |                                  |         |
| Pleasant/Happy                                                           | 3.28 (2.23, 4.83)                                                  | <.001*  | 2.06 (1.48, 2.87)                | <.001*  | 1.59 (1.15, 2.20)                | .01*    |
| Relaxed                                                                  | 3.70 (2.51, 5.44)                                                  | <.001*  | 1.60 (1.13, 2.28)                | .01*    | 2.31 (1.64, 3.25)                | <.001*  |
| Energetic                                                                | 1.71 (1.16, 2.54)                                                  | .01*    | 1.78 (1.18, 2.68)                | .01*    | .97 (.74, 1.25)                  | .79     |
| Increased sex drive                                                      | 1.98 (1.35, 2.91)                                                  | <.001*  | 1.36 (.92, 2.00)                 | .12     | 1.46 (1.14, 1.87)                | .001*   |
| Creative                                                                 | 1.94 (1.34, 2.81)                                                  | <.001*  | 1.41 (.97, 2.03)                 | .07     | 1.38 (1.07, 1.79)                | .01*    |
| Social                                                                   | 1.70 (1.18, 2.46)                                                  | .01*    | 1.15 (.81, 1.64)                 | .44     | 1.48 (1.13, 1.95)                | .01*    |
| Negative effects                                                         |                                                                    |         |                                  |         |                                  |         |
| Drowsy                                                                   | 3.42 (2.25, 5.17)                                                  | <.001*  | 3.48 (2.24, 5.39)                | <.001*  | 1.01 (.78, 1.31)                 | .94     |
| Unable to concentrate                                                    | 1.94 (1.29, 2.93)                                                  | .002*   | 2.80 (1.82, 4.32)                | <.001*  | .71 (.54, .92)                   | .01*    |
| Dizzy                                                                    | 1.84 (1.13, 2.98)                                                  | .01*    | 2.17 (1.33, 3.53)                | .002*   | .85 (.64, 1.12)                  | .25     |
| Out of control                                                           | 1.72 (.89, 3.30)                                                   | .11     | 2.88 (1.48, 5.60)                | .002*   | .60 (.43, .83)                   | .002*   |
| Lazy                                                                     | 3.15 (2.11, 4.70)                                                  | <.001*  | 2.80 (1.83, 4.28)                | <.001*  | 1.14 (.88, 1.48)                 | .33     |
| Upset stomach                                                            | 1.63 (.77, 3.42)                                                   | .20     | 3.74 (1.80, 7.78)                | <.001*  | .44 (.30, .62)                   | <.001*  |

Note. <sup>a</sup>From binary logistic regression generalized estimating equation (GEE) model predicting subjective effects from modes of cannabis use. <sup>b</sup>For composite scores of positive and negative effects, linear regression models were used and unstandardized linear regression parameters (Bs) are shown. <sup>c</sup>For individual subjective effects, binary logistic regression models were used odds ratios (ORs) are shown. \* Indicates statistical significance after correction using the Benjamini-Hochberg procedure.

Supplemental Figure 1. Prevalence of single- and poly-product past 6-month use patterns<sup>a</sup>

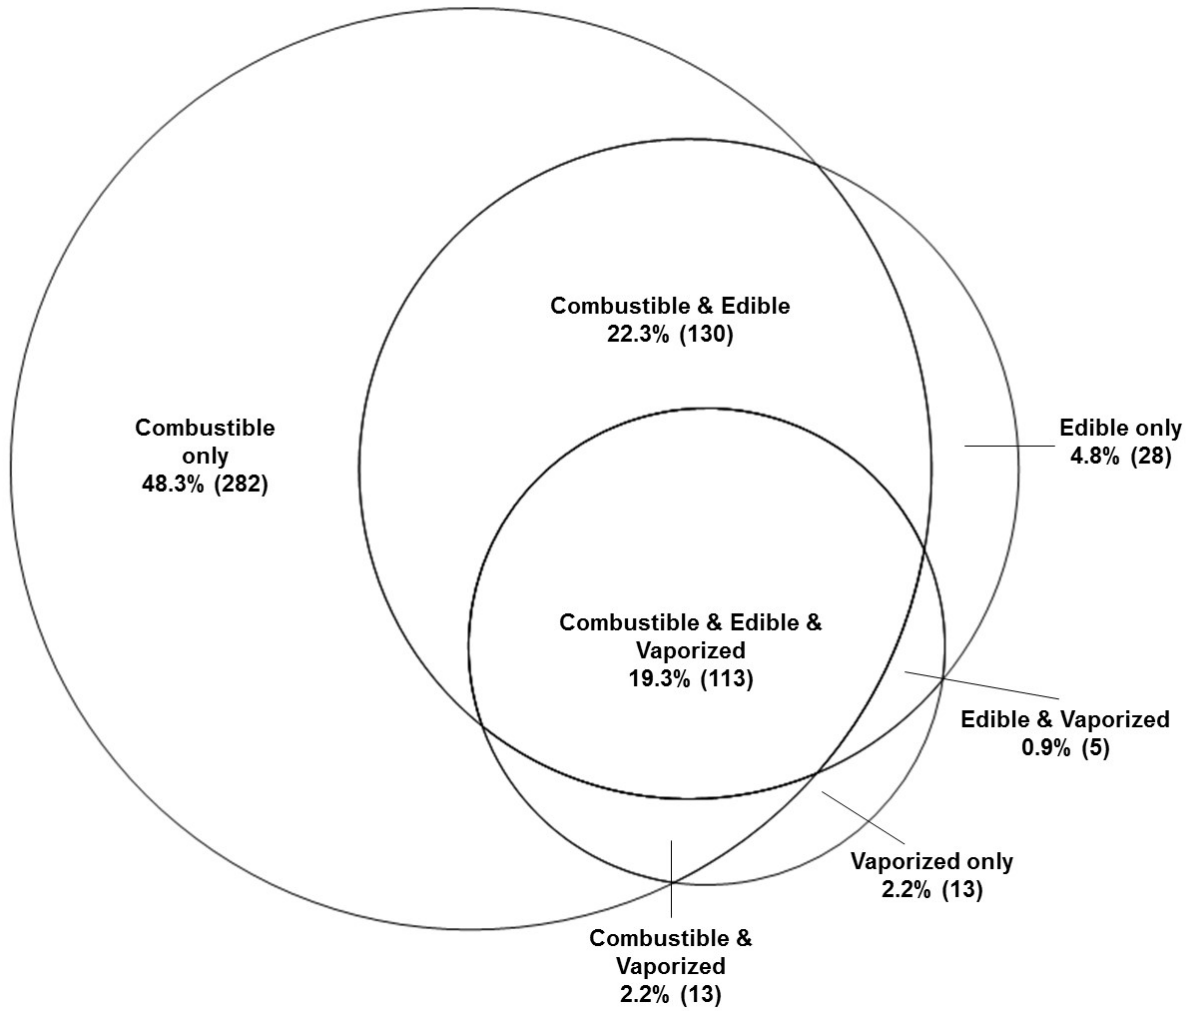

*Note.* <sup>a</sup>Data are expressed as % (No). The denominator is past 6-month users of cannabis in any form (n = 584). The size of the circles is proportional to the number of respondents in each group.
